# Supplementary material for: Lone-pair stabilized channels and blocked transport in apatite-related structures
Source: Royal Society of Chemistry journal article supplement (doi:10.1039/d1dt01485d), 2021-01-01
Supplement: d1dt01485d1.pdf [file d1dt01485d1.pdf]

## Electronic Supplementary Information (ESI)

### Lone-pair stabilized channels in apatite-related structures

Ce Tao<sup>ab</sup> and Rukang Li<sup>ab\*</sup>

- a. Center for Crystal Research and Development, Key Laboratory of Functional Crystals and Laser Technology, Technical Institute of Physics and Chemistry, Chinese Academy of Sciences  
Beijing 100190, P.R. China.
- b. Center of Materials Science and Optoelectronics Engineering, University of Chinese Academy of Sciences, Beijing 100049, P.R. China.

Table S1. Crystal data and structure refinement for Tb<sub>2</sub>Pb<sub>3</sub>Si<sub>3</sub>O<sub>12</sub> at 293(2) K.

|                                                     |                                                                     |
|-----------------------------------------------------|---------------------------------------------------------------------|
| Empirical formula                                   | Tb <sub>2</sub> Pb <sub>3</sub> Si <sub>3</sub> O <sub>12</sub>     |
| Formula weight                                      | 1215.66                                                             |
| Temperature                                         | 293(2) K                                                            |
| Wavelength                                          | 0.71073 Å                                                           |
| Crystal system                                      | hexagonal                                                           |
| Space group                                         | <i>P</i> 6 <sub>3</sub> / <i>m</i>                                  |
| Unit cell dimensions                                | <i>a</i> = 9.6395(2) Å<br><i>c</i> = 6.8787(2) Å                    |
| Volume                                              | 553.54(3) Å <sup>3</sup>                                            |
| <i>Z</i>                                            | 2                                                                   |
| Density (calculated)                                | 7.294 g/cm <sup>3</sup>                                             |
| θ range for data collection                         | 2.440 to 29.068°                                                    |
| Index ranges                                        | -12 ≤ <i>h</i> ≤ 13, -12 ≤ <i>k</i> ≤ 12, -6 ≤ <i>l</i> ≤ 9         |
| Reflections collected                               | 5914                                                                |
| Independent reflections                             | 522 [ <i>R</i> <sub>int</sub> = 0.0667]                             |
| Completeness to θ = 25.242°                         | 100%                                                                |
| Refinement method                                   | Full-matrix least-squares on <i>F</i> <sup>2</sup>                  |
| Data / restraints / parameters                      | 522 / 0 / 37                                                        |
| Goodness-of-fit                                     | 1.136                                                               |
| Final <i>R</i> indices [ <i>I</i> > 2σ( <i>I</i> )] | <i>R</i> <sub>obs</sub> = 0.0442, <i>wR</i> <sub>obs</sub> = 0.1208 |
| <i>R</i> indices [all data]                         | <i>R</i> <sub>all</sub> = 0.0460, <i>wR</i> <sub>all</sub> = 0.1221 |

$R = \sum ||F_o| - |F_c|| / \sum |F_o|$ ,  $wR = \{ \sum [w(|F_o|^2 - |F_c|^2)^2] / \sum [w(|F_o|^4)] \}^{1/2}$  and  
 $w = 1 / [ \sigma^2(F_o^2) + (0.0653P)^2 + 27.4284P ]$  where  $P = (F_o^2 + 2F_c^2) / 3$

Table S2. Atomic coordinates and equivalent isotropic displacement parameters for  $\text{Tb}_2\text{Pb}_3\text{Si}_3\text{O}_{12}$  at 293(2) K with estimated standard deviations in parentheses.

| Label | x          | y          | z          | Occupancy | $U_{\text{eq}}^*$ |
|-------|------------|------------|------------|-----------|-------------------|
| Pb    | -0.0057(1) | 0.7538(7)  | 0.7500     | 1         | 0.021(1)          |
| Tb    | 0.3333(4)  | 0.6667(12) | 0.5038(4)  | 1         | 0.010(1)          |
| Si    | 0.4139(6)  | 1.0302(6)  | 0.7500     | 1         | 0.010(1)          |
| O(1)  | 0.3533(18) | 0.8400(16) | 0.7500     | 1         | 0.017(3)          |
| O(2)  | 0.6080(15) | 1.1385(15) | 0.7500     | 1         | 0.019(3)          |
| O(3)  | 0.3635(17) | 1.0953(14) | 0.9420(14) | 1         | 0.035(3)          |

\* $U_{\text{eq}}$  is defined as one third of the trace of the orthogonalized  $U_{ij}$  tensor.

Table S3. Bond lengths [ $\text{\AA}$ ] for  $\text{Tb}_2\text{Pb}_3\text{Si}_3\text{O}_{12}$  at 293(2) K with estimated standard deviations in parentheses.

| Label      | Distances |
|------------|-----------|
| Pb-O(1)    | 2.375(13) |
| Pb-O(2)x2  | 2.384(12) |
| Pb-O(2)'x2 | 2.562(14) |
| Tb-O(1)x3  | 2.319(9)  |
| Tb-O(2)x3  | 2.415(7)  |
| Tb-O(3)x3  | 2.698(14) |
| Si-O(1)    | 1.622(13) |
| Si-O(2)    | 1.624(5)  |
| Si-O(3)    | 1.638(14) |
| Si-O(4)    | 1.638(12) |

Table S4. Selected Bond angles [ $^\circ$ ] for  $\text{Tb}_2\text{Pb}_3\text{Si}_3\text{O}_{12}$  at 293(2) K

| Label         | Angles   |
|---------------|----------|
| O(1)-Pb-O(2)  | 84.6(3)  |
| O(1)-Pb-O(2)' | 69.5(4)  |
| O(2)'-Pb-O(2) | 62.0(7)  |
| O(3)-Tb-O(3)  | 72.7(4)  |
| O(3)-Tb-O(1)  | 93.5(3)  |
| O(3)-Tb-O(1)  | 146.8(4) |
| O(3)-Tb-O(2)  | 142.0(5) |
| O(3)-Tb-O(2)' | 80.6(4)  |
| O(3)-Si-O(1)  | 111.8(7) |

Table S5. Crystal data for Pb<sub>5</sub>SiP<sub>2</sub>O<sub>12</sub> at 293(2) K.

|                                                     |                                                                     |
|-----------------------------------------------------|---------------------------------------------------------------------|
| Empirical formula                                   | Pb <sub>5</sub> SiP <sub>2</sub> O <sub>12</sub>                    |
| Formula weight                                      | 2636.07                                                             |
| Temperature                                         | 293(2) K                                                            |
| Wavelength                                          | 0.71073 Å                                                           |
| Crystal system                                      | hexagonal                                                           |
| Space group                                         | <i>P</i> 6 <sub>3</sub> / <i>m</i>                                  |
| Unit cell dimensions                                | <i>a</i> = 9.7637(14) Å<br><i>c</i> = 7.2791(15) Å                  |
| Volume                                              | 600.9(2) Å <sup>3</sup>                                             |
| <i>Z</i>                                            | 2                                                                   |
| Density (calculated)                                | 7.284 g/cm <sup>3</sup>                                             |
| θ range for data collection                         | 2.409 to 27.430°                                                    |
| Index ranges                                        | -12 ≤ <i>h</i> ≤ 10, -12 ≤ <i>k</i> ≤ 12, -9 ≤ <i>l</i> ≤ 9         |
| Reflections collected                               | 5643                                                                |
| Independent reflections                             | 495 [ <i>R</i> <sub>int</sub> = 0.0991]                             |
| Completeness to θ = 25.242°                         | 100%                                                                |
| Refinement method                                   | Full-matrix least-squares on <i>F</i> <sup>2</sup>                  |
| Data / restraints / parameters                      | 495 / 0 / 24                                                        |
| Goodness-of-fit                                     | 1.437                                                               |
| Final <i>R</i> indices [ <i>I</i> > 2σ( <i>I</i> )] | <i>R</i> <sub>obs</sub> = 0.0571, <i>wR</i> <sub>obs</sub> = 0.1043 |
| <i>R</i> indices [all data]                         | <i>R</i> <sub>all</sub> = 0.0590, <i>wR</i> <sub>all</sub> = 0.1051 |
| Extinction coefficient                              | 0.0054(5)                                                           |

$R = \sum ||F_o| - |F_c|| / \sum |F_o|$ ,  $wR = \{ \sum [w(|F_o|^2 - |F_c|^2)^2] / \sum [w(|F_o|^4)] \}^{1/2}$  and  $w = 1 / [\sigma^2(F_o^2) + 57.6948P]$  where  $P = (F_o^2 + 2F_c^2) / 3$

Table S6. Atomic coordinates and equivalent isotropic displacement parameters for Pb<sub>5</sub>SiP<sub>2</sub>O<sub>12</sub> at 293(2) K with estimated standard deviations in parentheses.

| Label | <i>x</i>   | <i>y</i>   | <i>z</i>  | Occupancy | <i>U</i> <sub>eq</sub> <sup>*</sup> |
|-------|------------|------------|-----------|-----------|-------------------------------------|
| Pb(1) | 0.2503(12) | 0.0002(2)  | 0.2500    | 1         | 0.014(1)                            |
| Pb(2) | 0.3333.33  | -0.3333.33 | 0.0042(4) | 1         | 0.013(3)                            |
| Si(3) | 0.6210(7)  | 0.0187(8)  | 0.2500    | 0.333     | 0.003(2)                            |
| P(3)  | 0.6210(7)  | 0.0187(8)  | 0.2500    | 0.6666    | 0.003(2)                            |

|      |            |             |            |   |          |
|------|------------|-------------|------------|---|----------|
| O(1) | 0.5060(12) | 0.0930(12)  | 0.2500     | 1 | 0.012(4) |
| O(2) | 0.7292(17) | 0.0786(17)  | 0.4218(17) | 1 | 0.012(3) |
| O(3) | 0.5200(13) | -0.1660(14) | 0.2500     | 1 | 0.010(6) |

\* $U_{eq}$  is defined as one third of the trace of the orthogonalized  $U_{ij}$  tensor.

Table S7. Selected bond lengths [ $\text{\AA}$ ] for  $\text{Pb}_5\text{SiP}_2\text{O}_{12}$  at 293(2) K.

| Label          | Distances |
|----------------|-----------|
| Pb(1)-O(1)     | 2.19(2)   |
| Pb(1)-O(2)'x2  | 2.631(11) |
| Pb(1)-O(2)x2   | 2.548(14) |
| Pb(1)-O(3)     | 2.75(2)   |
| Pb(2)-O(2)x3   | 2.75(2)   |
| Pb(2)-O(3)x3   | 2.492(8)  |
| Si/P(3)-O(1)   | 1.61(4)   |
| Si/P(3)-O(2)x2 | 1.550(13) |
| Si/P(3)-O(3)   | 1.56(2)   |

Table S8. Selected bond angles [ $^\circ$ ] for  $\text{Pb}_5\text{SiP}_2\text{O}_{12}$  at 293(2) K.

| Label             | Angles    |
|-------------------|-----------|
| O(1)-Pb(1)-O(1)'  | 139.0(6)  |
| O(1)-Pb(1)-O(3)   | 150.8(7)  |
| O(1)-Pb(1)-O(3)'  | 71.7(3)   |
| O(1)-Pb(1)-O(2)   | 79.3(6)   |
| O(2)-Pb(1)-O(3)   | 95.7(7)   |
| O(1)-(P/Si)-O(1)' | 108.1(11) |
| O(1)-(P/Si)-O(2)  | 108.8(8)  |
| O(1)-(P/Si)-O(3)  | 110.7(7)  |

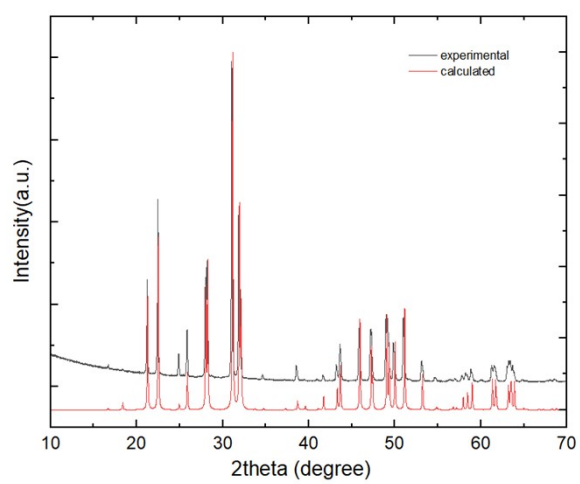

Figure S1. PXRD patterns for  $Tb_2Pb_3Si_3O_{12}$
